# Supplementary material for: CD19 CAR immune pressure induces B-precursor acute lymphoblastic leukaemia lineage switch exposing inherent leukaemic plasticity
Source: PubMed Central journal article supplement (PMC4974466; doi:10.1038/ncomms12320), 2016-07-27
Supplement: ncomms12320-s1.pdf [file ncomms12320-s1.pdf]

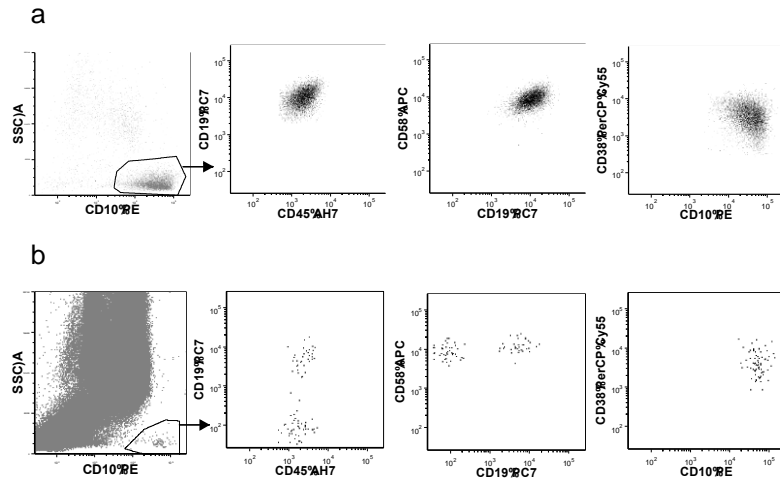

Supplementary Figure 1: Flow cytometry plots of bone marrow from patient ALL\_H0082 pre-CAR (a) and post CAR (b). panels are gated on CD10+ SSC leukemic blasts.

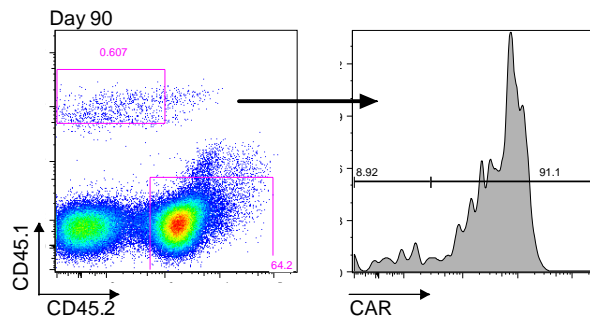

Supplementary Figure 2: C57Bl/6 mice injected with E2a:PBX leukemia and treated with mCD19 CAR were sacrificed on dy +90. Splenocytes were harvested and stained for CD45 isoforms, T cell markers and protein L for CAR T cell detection, and analyzed by flow cytometry. The histogram on the right represents adoptively transferred T cells gated on CD45.1 isoform.

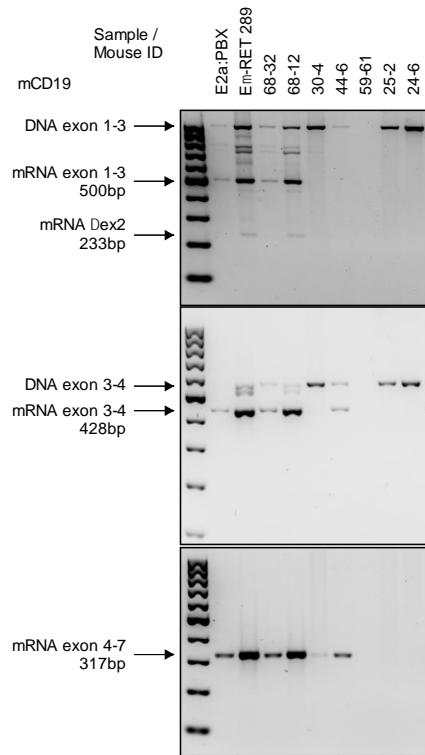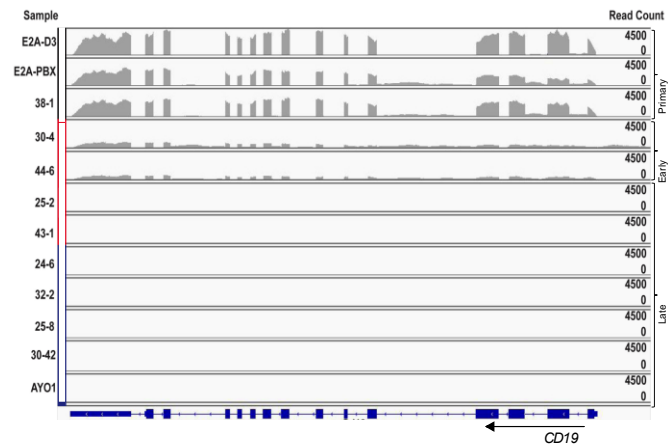

Supplementary Figure 3: RNA was extracted from parent E2a:PBX and Eu-RET cell lines, untreated splenocytes from E2a:PBX leukemic mice, and post-CD19-CAR CD19<sup>+</sup> relapses. Left panel: CD19 exon specific primers were used in a PCR reaction and run on a gel. Locations of specific DNA and RNA sites are marked, and were confirmed by band sequencing. Right panel: screen-shot from RNA-sequencing directed at the CD19 transcript.

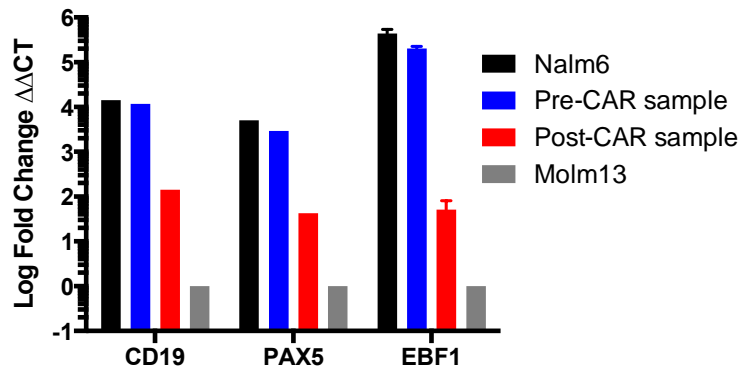

Supplementary Figure 4: mRNA expression of CD19, PAX5 and EBF1 by real-time RTPCR expression of NALM6 (pre-B ALL cell line, black bars), Molm13 (AML cell line, grey bars), and leukemic cells from patient ALL\_H0140 (figure 1g-h) pre CD19-CAR (blue bars) and post CD19 CAR (red bars).

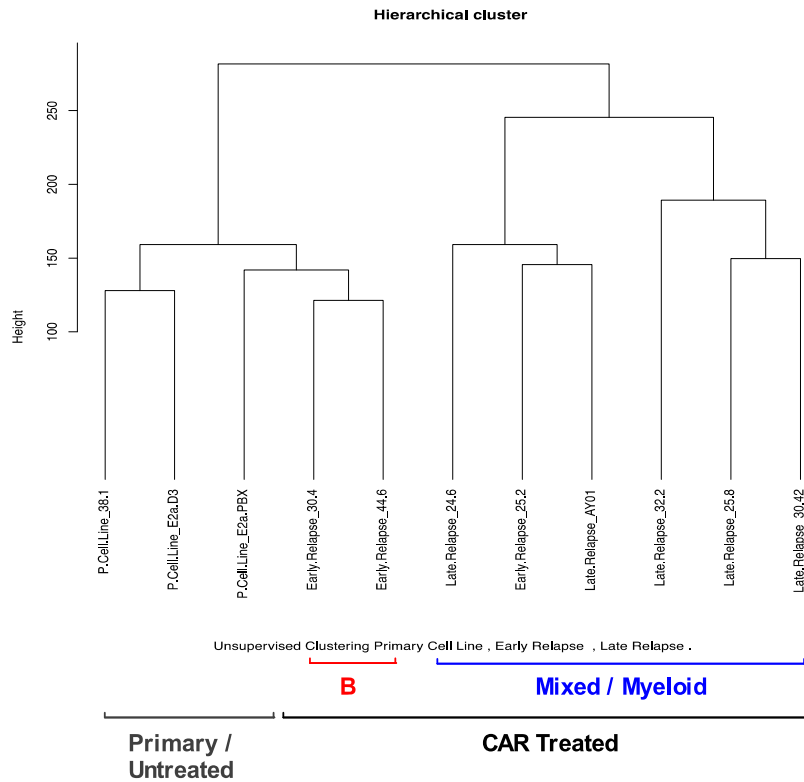

Supplementary Figure 5: Unsupervised hierarchical clustering on primary and post-CD19 CAR relapses of E2a:PBX murine leukemia, clustering 2 post-CAR samples with CD19<sup>+</sup> B-ALL (marked in red) with the primary/untreated samples, and separate from the lineage switch samples (marked in blue).

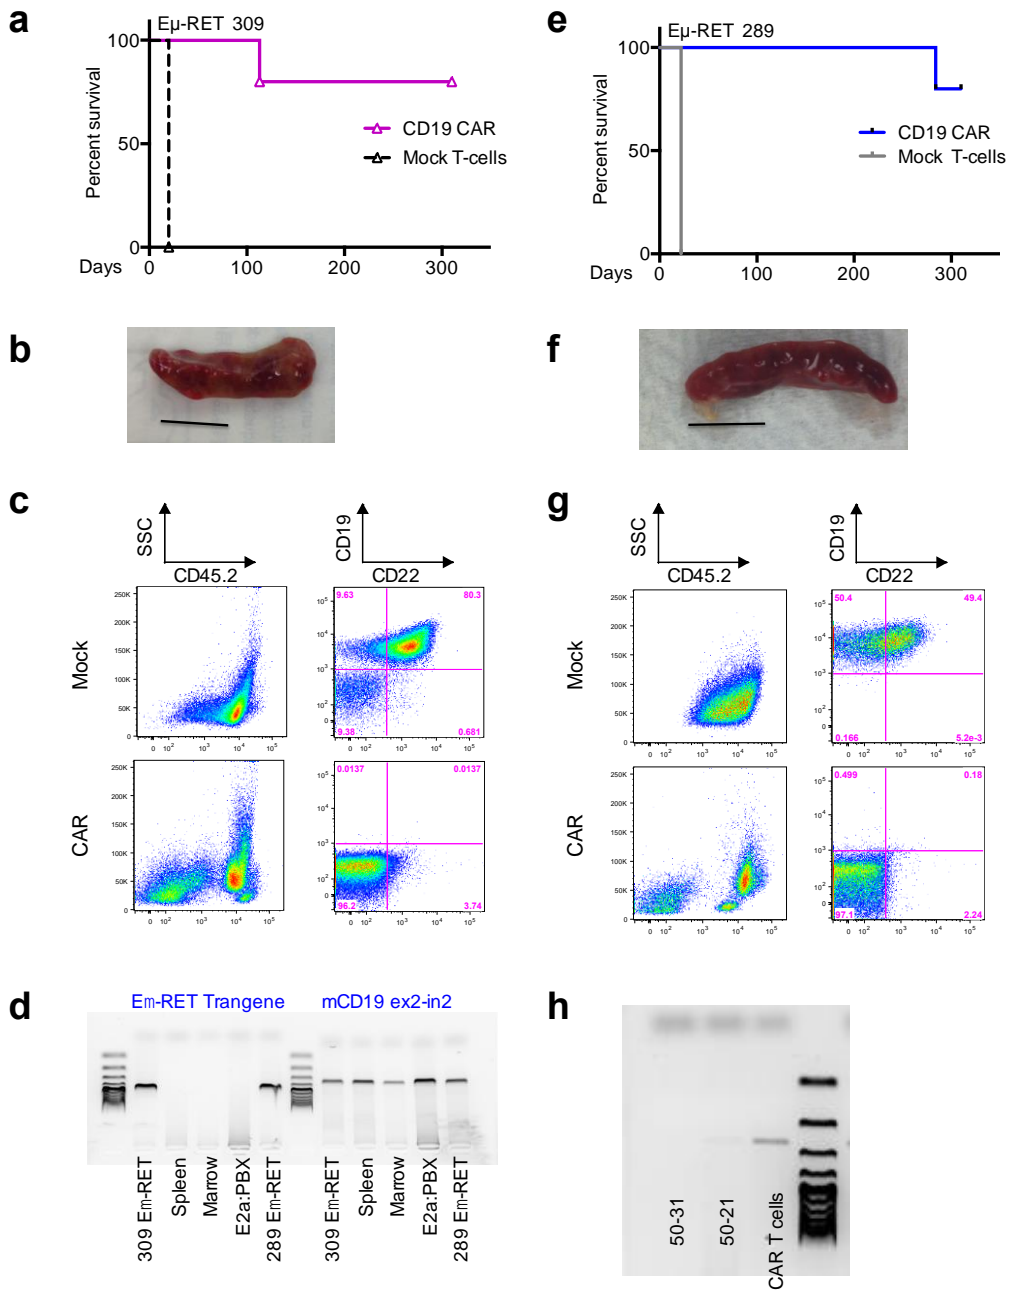

Supplementary Figure 6: Eμ-RET leukemia does not relapse following CD19 CAR and does not develop a lineage switch. (A-D) experiments performed on 309-Eμ-RET cell line. (a) survival curve of Balb/c mice treated as in figure 1a, with syngeneic  $3 \times 10^5$  CD19 CAR T cells ( $n=5$  mice per group). (b) Phenotype of a spleen of a mouse that died following CAR treatment, demonstrating sclerosis. Size bar is 1cm. (c) flow cytometry plots of mock treated (top) or CAR treated (bottom) Balb/C mice bearing 309-Eμ-RET leukemia. (d) PCR on genomic DNA for the Eμ-RET transgene was performed in tissues of the mouse found to die following CD19 CAR treatment. Controls include parent 309 and 289 Eμ-RET leukemia as positive controls, as well as E2a:PBX as a negative control. (e-g) similar graphs as in (a-c) on 289-Eu-RET ALL,

demonstrating late mortality in 1 of 5 mice following CD19 CAR, same phenotype of post-CAR mice with sclerotic spleen and absence of CD19+ cells or of a leukemic population. (h) PCR for the CD19 CAR was done in genomic DNA from mice dying late post CAR following 289 (50-21) or 309 (50-31) E $\mu$ -RET leukemia. DNA extracted from CAR T cells used a control.

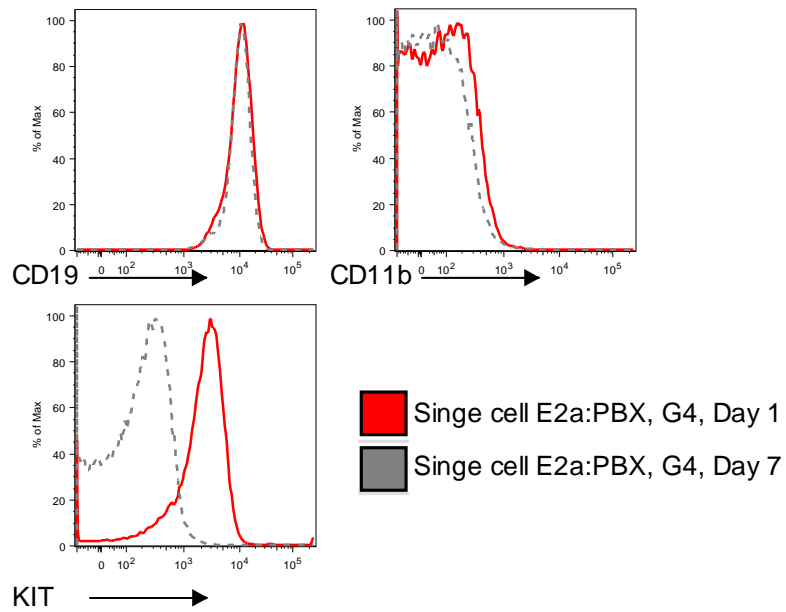

Supplementary Figure 7: Flow cytometry plots showing single cell cloning of E2a:PBX which resulted in a clone with high cKIT expression (red), with absence of cKIT positive cells following 1 week in culture (grey line).



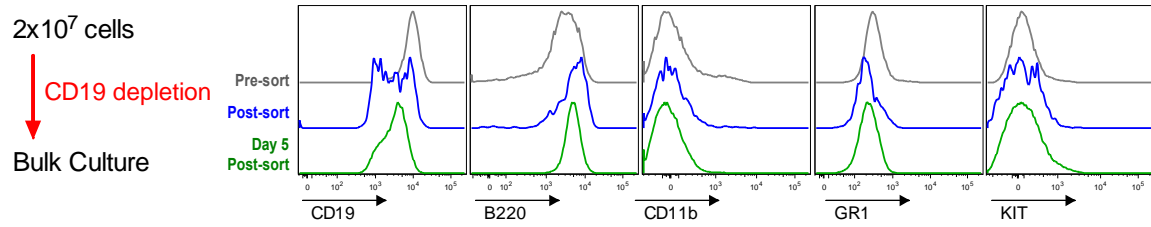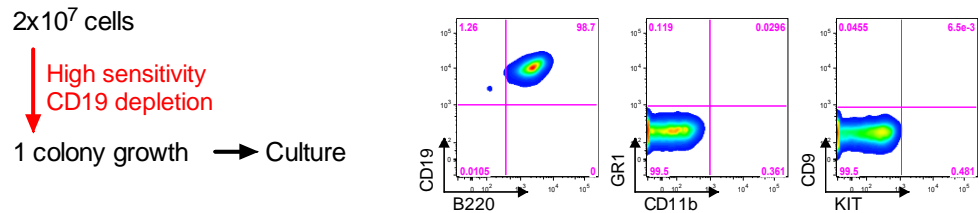

Supplementary Figure 8: Lack of myeloid cells upon antibody-based CD19 depletion of E2a:PBX cell lines. Upper panel: 20x10<sup>7</sup> E2a:PBX cells were sorted using CD19 labeled magnetic beads in Miltenyi AutoMACS system, with the negative fraction kept in culture. Flow cytometry on pre-sorted cells (grey), immediate post-sort negative fraction (blue) and day 5 in culture following sort (green). Bottom panel: We conducted this experiment using a high sensitivity LD column for sorting, and single cell cloned immediately. Flow cytometry plots of the single colony that grew shown.

Murine CD19<sup>-</sup> B-ALL post CD19 CAR relapse

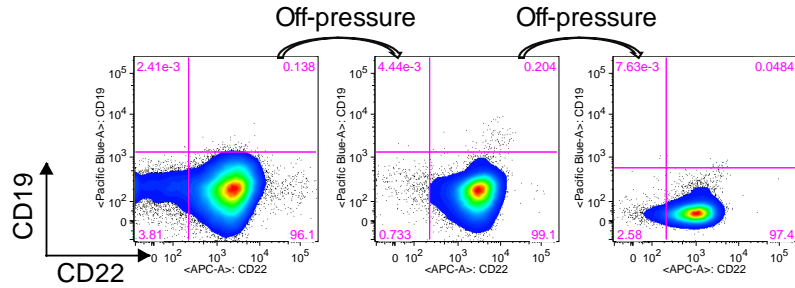

Human CD19<sup>-</sup> B-ALL post CD19 CAR relapse

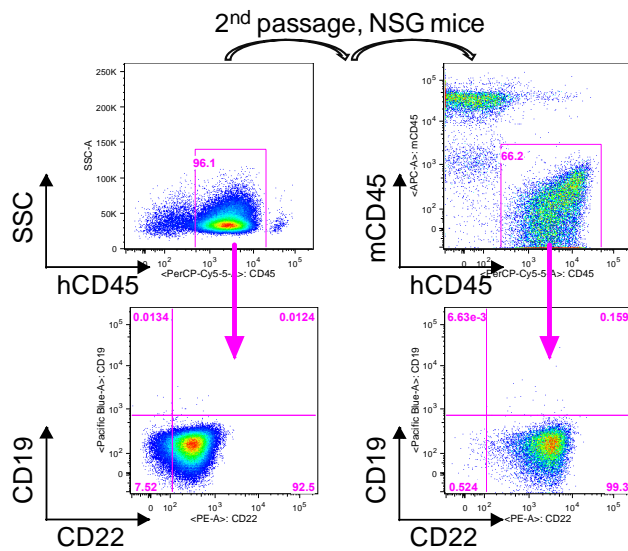

Supplementary Figure 9: Stability of CD19<sup>-</sup> B-ALL in murine and patient samples upon re-passaging off immune-pressure. Upper panel: Murine post-CAR sample 30-4 was passaged twice into mice off immunopressure, causing stable CD19<sup>-</sup> B-ALL in recipients. Lower panel: Patient sample with CD19<sup>-</sup> B-ALL following CD19 CAR was passaged twice in NSG mice. Flow cytometry analysis shown.

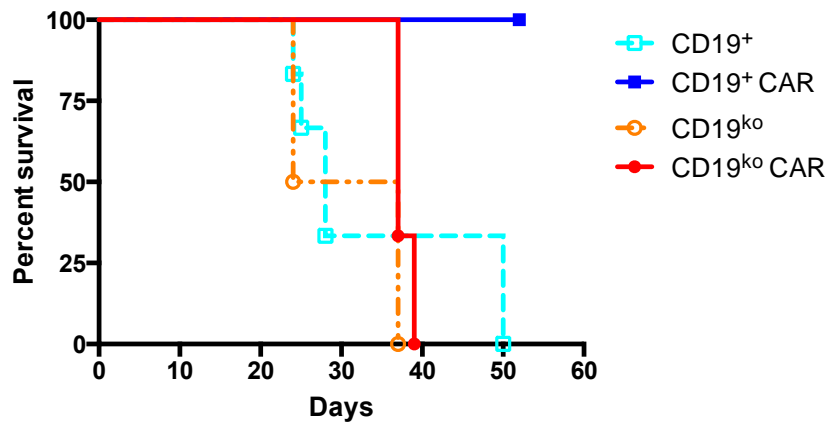

Supplementary Figure 10: Survival curve of E2a:PBX ALL injected mice untreated (cyan) or following CD19-CAR (blue); and of CD19<sup>ko</sup>-E2a:PBX (generated using the CRISPR/CAS9 system) untreated (orange) or CD19-CAR treated (red).

Supplementary Table 1: Primary E2a:PBX cell lines and mouse relapse IDs

| Sample     | Description                                  | Days to relapse | Immunophenotype                                                                                                                                                                                              | E2a:PBX1 PCR |
|------------|----------------------------------------------|-----------------|--------------------------------------------------------------------------------------------------------------------------------------------------------------------------------------------------------------|--------------|
| E2a:PBX    | Primary bulk cell line                       | NA              | CD19 <sup>+</sup> CD22 <sup>+</sup> CD127 <sup>+</sup> B220 <sup>+</sup> BP1 <sup>dim</sup> CD93 <sup>+</sup><br>CD43 <sup>+</sup> KIT <sup>-</sup> CD9 <sup>-</sup> Gr1 <sup>-</sup> CD11b <sup>-</sup>     | +            |
| E2a:PBX B3 | Single cell clone                            | NA              | CD19 <sup>+</sup> CD22 <sup>+</sup> CD127 <sup>+</sup> B220 <sup>+</sup> BP1 <sup>dim</sup> CD93 <sup>+</sup><br>CD43 <sup>+</sup> KIT <sup>-</sup> CD9 <sup>-</sup> Gr1 <sup>-</sup> CD11b <sup>-</sup>     | +            |
| E2a:PBX D3 | Single cell clone                            | NA              | CD19 <sup>+</sup> CD22 <sup>+</sup> CD127 <sup>+</sup> B220 <sup>dim</sup> BP1 <sup>+</sup> CD93 <sup>+</sup><br>CD43 <sup>+</sup> KIT <sup>-</sup> CD9 <sup>-</sup> Gr1 <sup>-</sup> CD11b <sup>-</sup>     | +            |
| E2a:PBX G4 | Single cell clone                            | NA              | CD19 <sup>+</sup> CD22 <sup>+</sup> CD127 <sup>+</sup> B220 <sup>+</sup> BP1 <sup>dim</sup> CD93 <sup>+</sup><br>CD43 <sup>+</sup> KIT <sup>-</sup> CD9 <sup>-</sup> Gr1 <sup>-</sup> CD11b <sup>-</sup>     | +            |
| 38-1       | Mock treated <i>in vivo</i>                  | 18              | CD19 <sup>+</sup> CD22 <sup>+</sup> CD127 <sup>+</sup> B220 <sup>+</sup> BP1 <sup>dim</sup> CD93 <sup>+</sup><br>CD43 <sup>+</sup> KIT <sup>dim</sup> CD9 <sup>-</sup> Gr1 <sup>-</sup> CD11b <sup>-</sup>   | +            |
| 68-32      | Single cell clone <i>in vivo</i> , untreated | 24              | CD19 <sup>+</sup> CD22 <sup>+</sup> CD127 <sup>+</sup> B220 <sup>+</sup> BP1 <sup>dim</sup> CD93 <sup>+</sup><br>CD43 <sup>+</sup> KIT <sup>-</sup> CD9 <sup>-</sup> Gr1 <sup>-</sup> CD11b <sup>-</sup>     | +            |
| 68-12      | Single cell clone <i>in vivo</i> , untreated | 25              | CD19 <sup>+</sup> CD22 <sup>+</sup> CD127 <sup>+</sup> B220 <sup>+</sup> BP1 <sup>dim</sup> CD93 <sup>+</sup><br>CD43 <sup>+</sup> KIT <sup>-</sup> CD9 <sup>-</sup> Gr1 <sup>-</sup> CD11b <sup>-</sup>     | +            |
| 78-51      | Cy/ARA-C treated                             | 20              | CD19 <sup>+</sup> CD22 <sup>+</sup> CD127 <sup>+</sup> B220 <sup>+</sup> BP1 <sup>+</sup> CD93 <sup>+</sup><br>CD43 <sup>+</sup> KIT <sup>dim</sup> CD9 <sup>-</sup> Gr1 <sup>-</sup> CD11b <sup>-</sup>     | +            |
| 78-53      | Cy/ARA-C treated                             | 28              | CD19 <sup>+</sup> CD22 <sup>+</sup> CD127 <sup>+</sup> B220 <sup>+</sup> BP1 <sup>dim</sup> CD93 <sup>+</sup><br>CD43 <sup>+</sup> KIT <sup>-</sup> CD9 <sup>-</sup> Gr1 <sup>-</sup> CD11b <sup>-</sup>     | +            |
| 78-54      | Cy/ARA-C treated                             | 31              | CD19 <sup>+</sup> CD22 <sup>+</sup> CD127 <sup>+</sup> B220 <sup>+</sup> BP1 <sup>+</sup> CD93 <sup>+</sup><br>CD43 <sup>+</sup> KIT <sup>dim</sup> CD9 <sup>-</sup> Gr1 <sup>-</sup> CD11b <sup>-</sup>     | +            |
| 78-55      | Cy/ARA-C treated                             | 41              | CD19 <sup>+</sup> CD22 <sup>+</sup> CD127 <sup>+</sup> B220 <sup>+</sup> BP1 <sup>+</sup> CD93 <sup>+</sup><br>CD43 <sup>+</sup> KIT <sup>dim</sup> CD9 <sup>-</sup> Gr1 <sup>-</sup> CD11b <sup>-</sup>     | +            |
| 30-4       | CAR treated                                  | 46              | CD19 <sup>-</sup> CD22 <sup>+</sup> CD127 <sup>+</sup> B220 <sup>+</sup> BP1 <sup>-</sup> CD93 <sup>-</sup><br>CD43 <sup>+</sup> KIT <sup>-</sup> Gr1 <sup>-</sup> CD11b <sup>-</sup>                        | +            |
| 44-6       | CAR treated                                  | 47              | CD19 <sup>-</sup> CD22 <sup>+</sup> CD127 <sup>dim</sup> B220 <sup>+</sup> BP1 <sup>+</sup> CD93 <sup>+</sup><br>CD43 <sup>+</sup> KIT <sup>-</sup> CD9 <sup>-</sup> Gr1 <sup>-</sup> CD11b <sup>-</sup>     | +            |
| 59-61      | CAR treated                                  | 58              | CD19 <sup>-</sup> CD22 <sup>+</sup> CD127 <sup>-</sup> B220 <sup>+</sup> BP1 <sup>-</sup> CD93 <sup>dim</sup><br>CD43 <sup>+</sup> KIT <sup>-</sup> CD9 <sup>+</sup> Gr1 <sup>+</sup> CD11b <sup>+</sup>     | +            |
| 25-2       | CAR treated                                  | 76              | CD19 <sup>-</sup> CD22 <sup>+</sup> CD127 <sup>dim</sup> B220 <sup>dim</sup> BP1 <sup>+</sup> CD93 <sup>+</sup><br>CD43 <sup>+</sup> KIT <sup>-</sup> CD9 <sup>dim</sup> Gr1 <sup>-</sup> CD11b <sup>+</sup> | +            |
| 43-1       | CAR treated                                  | 76              | CD19 <sup>-</sup> CD22 <sup>+</sup> CD127 <sup>+</sup> B220 <sup>-</sup> BP1 <sup>dim</sup> CD93 <sup>+</sup><br>CD43 <sup>+</sup> KIT <sup>dim</sup> CD9 <sup>+</sup> Gr1 <sup>+</sup> CD11b <sup>+</sup>   | +            |
| A001       | CAR treated                                  | 90              | CD19 <sup>-</sup> CD22 <sup>-</sup> CD127 <sup>-</sup> B220 <sup>-</sup> BP1 <sup>dim</sup> CD93 <sup>dim</sup><br>CD43 <sup>+</sup> KIT <sup>dim</sup> CD9 <sup>+</sup> Gr1 <sup>-</sup> CD11b <sup>-</sup> | +            |
| 24-6       | CAR treated                                  | 110             | CD19 <sup>-</sup> CD22 <sup>-</sup> CD127 <sup>-</sup> B220 <sup>-</sup> BP1 <sup>-</sup> CD93 <sup>+</sup><br>CD43 <sup>+</sup> KIT <sup>dim</sup> CD9 <sup>dim</sup> Gr1 <sup>dim</sup> CD11b <sup>+</sup> | +            |
| 30-42      | CAR treated                                  | 121             | CD19 <sup>-</sup> CD22 <sup>-</sup> CD127 <sup>-</sup> B220 <sup>-</sup> BP1 <sup>-</sup> CD93 <sup>-</sup><br>CD43 <sup>+</sup> KIT <sup>-</sup> CD9 <sup>+</sup> Gr1 <sup>-</sup> CD11b <sup>-</sup>       | +            |
| 32-2       | CAR treated                                  | 160             | CD19 <sup>-</sup> CD22 <sup>-</sup> CD127 <sup>-</sup> B220 <sup>-</sup> BP1 <sup>-</sup> CD93 <sup>dim</sup><br>CD43 <sup>+</sup> KIT <sup>dim</sup> CD9 <sup>+</sup> Gr1 <sup>+</sup> CD11b <sup>+</sup>   | +            |
| 25-8       | CAR treated                                  | 210             | CD19 <sup>-</sup> CD22 <sup>-</sup> CD127 <sup>dim</sup> B220 <sup>-</sup> BP1 <sup>-</sup> CD93 <sup>+</sup><br>CD43 <sup>+</sup> KIT <sup>+</sup> Gr1 <sup>-</sup> CD11b <sup>-</sup>                      | -            |
| 48-21      | CAR treated                                  | 225             | CD19 <sup>-</sup> CD22 <sup>-</sup> CD127 <sup>-</sup> B220 <sup>-</sup> BP1 <sup>-</sup> CD93 <sup>dim</sup><br>CD43 <sup>+</sup> KIT <sup>-</sup> CD9 <sup>-</sup> Gr1 <sup>-</sup> CD11b <sup>-</sup>     | -            |
| 48-22      | CAR treated                                  | 232             | CD19 <sup>-</sup> CD22 <sup>-</sup> CD127 <sup>-</sup> B220 <sup>-</sup> BP1 <sup>-</sup> CD93 <sup>dim</sup><br>CD43 <sup>+</sup> KIT <sup>+</sup> CD9 <sup>-</sup> Gr1 <sup>+</sup> CD11b <sup>-</sup>     | -            |
| 21-1       | CAR treated                                  | 268             | CD19 <sup>-</sup> CD22 <sup>-</sup> CD127 <sup>-</sup> B220 <sup>-</sup> BP1 <sup>-</sup> CD93 <sup>-</sup><br>CD43 <sup>+</sup> KIT <sup>-</sup> Gr1 <sup>+</sup> CD11b <sup>+</sup>                        | +            |
| 47-24      | 21-1, <i>in vivo</i> passage                 | NA              | CD19 <sup>-</sup> CD22 <sup>-</sup> CD127 <sup>-</sup> B220 <sup>-</sup> BP1 <sup>-</sup> CD93 <sup>-</sup><br>CD43 <sup>+</sup> KIT <sup>-</sup> Gr1 <sup>+</sup> CD11b <sup>+</sup>                        | +            |
| 53-41      | 44-6, <i>in vivo</i> passage                 | NA              | CD19 <sup>-</sup> CD22 <sup>+</sup> CD127 <sup>dim</sup> B220 <sup>+</sup> BP1 <sup>+</sup> CD93 <sup>+</sup><br>CD43 <sup>+</sup> KIT <sup>-</sup> CD9 <sup>-</sup> Gr1 <sup>-</sup> CD11b <sup>-</sup>     | +            |
| 53-42      | 44-6, <i>in vivo</i> passage                 | NA              | CD19 <sup>-</sup> CD22 <sup>+</sup> CD127 <sup>dim</sup> B220 <sup>+</sup> BP1 <sup>+</sup> CD93 <sup>+</sup><br>CD43 <sup>+</sup> KIT <sup>-</sup> CD9 <sup>-</sup> Gr1 <sup>-</sup> CD11b <sup>-</sup>     | +            |
